# Supplementary material for: The high-expression programming of SR-B1 mediates adrenal dysfunction in female offspring induced by prenatal caffeine exposure and its cholesterol accumulation mechanism
Source: Royal Society of Chemistry journal article supplement (doi:10.1039/d3fo03561a), 2023-12-09
Supplement: d3fo03561a2.pdf [file d3fo03561a2.pdf]

## Raw data

### Animal experiment results

PW12

Serum CORT

|         | OD      | Y值        |           | CORT        | Mean        | P value     |  |
|---------|---------|-----------|-----------|-------------|-------------|-------------|--|
| control | 1.922   | 4.646864  | 464.6864  | 160.9952501 | 503.8801843 | 0.017589273 |  |
|         | 2.019   | 3.608105  | 360.8105  | 125.0064058 |             |             |  |
|         | 1.403   | 13.999681 | 1399.9681 | 485.0329479 |             |             |  |
|         | 1.287   | 17.540553 | 1754.0553 | 607.7099992 |             |             |  |
|         | 1.467   | 12.353352 | 1235.3352 | 427.9942334 |             |             |  |
|         | 1.444   | 12.922981 | 1292.2981 | 447.7295997 |             |             |  |
|         | 1.276   | 17.92008  | 1792.008  | 620.8590917 |             |             |  |
|         | 1.372   | 14.87006  | 1487.006  | 515.1880988 |             |             |  |
|         | 1.314   | 16.643639 | 1664.3639 | 576.6355168 |             |             |  |
|         | 1.217   | 20.108202 | 2010.8202 | 696.6687665 |             |             |  |
|         | 1.099   | 25.411719 | 2541.1719 | 880.4144165 |             |             |  |
|         | 1.385   | 14.498871 | 1449.8871 | 502.3278847 |             |             |  |
|         | PCE (H) | 1.49      | 11.806784 | 1180.6784   | 409.0578385 | 329.0351754 |  |
|         |         | 1.508     | 11.394341 | 1139.4341   | 394.7683383 |             |  |
| 1.629   |         | 8.931482  | 893.1482  | 309.4401254 |             |             |  |
| 1.548   |         | 10.523057 | 1052.3057 | 364.5818328 |             |             |  |
| 1.622   |         | 9.060619  | 906.0619  | 313.9142059 |             |             |  |
| 1.889   |         | 5.036961  | 503.6961  | 174.5105508 |             |             |  |
| 1.449   |         | 12.797123 | 1279.7123 | 443.3691235 |             |             |  |
| 1.336   |         | 15.947344 | 1594.7344 | 552.5116802 |             |             |  |
| 1.769   |         | 6.636229  | 663.6229  | 229.9187899 |             |             |  |
| 1.67    |         | 8.204426  | 820.4426  | 284.2505432 |             |             |  |
| 1.67    |         | 8.204426  | 820.4426  | 284.2505432 |             |             |  |
| 1.858   |         | 5.42194   | 542.194   | 187.8485332 |             |             |  |

Serum cholesterol

|         | OD value | T-CHO   | OD (A-B) | HDL-C       | OD (A-B)    | LDL-C       |             |
|---------|----------|---------|----------|-------------|-------------|-------------|-------------|
| control | 0.124    | 2.96515 | 0.045    | 1.45625588  | -0.719      | -49.7748092 |             |
|         | 0.121    | 2.8511  | 0.034    | 1.011288805 | 0.047       | 2.851145038 |             |
|         | 0.107    | 2.3189  | 0.042    | 1.334901223 | 0.046       | 2.782442748 |             |
|         | 0.113    | 2.54699 | 0.063    | 2.184383819 | 0.042       | 2.507633588 |             |
|         | 0.18     | 5.09397 | 0.044    | 1.415804327 | 0.047       | 2.851145038 |             |
|         | 0.122    | 2.88912 | 0.047    | 1.537158984 | 0.053       | 3.263358779 |             |
|         | 0.122    | 2.88912 | 0.04     | 1.253998119 | 0.058       | 3.606870229 |             |
|         | 0.142    | 3.64941 | 0.069    | 2.427093133 | 0.057       | 3.538167939 |             |
|         | 0.106    | 2.28088 | 0.038    | 1.173095014 | 0.045       | 2.713740458 |             |
|         | 0.126    | 3.04118 | 0.04     | 1.253998119 | 0.046       | 2.782442748 |             |
|         | 0.12     | 2.81309 | 0.027    | 0.72812794  | 0.05        | 3.057251908 |             |
|         | 0.103    | 2.16684 | 0.019    | 0.404515522 | 0.046       | 2.782442748 |             |
|         | PCE (H)  | 0.128   | 3.11721  | 0.047       | 1.537158984 | 0.053       | 3.263358779 |
|         |          | 0.101   | 2.09081  | 0.05        | 1.658513641 | 0.047       | 2.851145038 |
| 0.111   |          | 2.47096 | 0.034    | 1.011288805 | 0.045       | 2.713740458 |             |
| 0.105   |          | 2.24287 | 0.029    | 0.779868297 | 0.047       | 2.851145038 |             |
| 0.125   |          | 3.00316 | 0.045    | 1.45625588  | 0.045       | 2.713740458 |             |
| 0.123   |          | 2.92713 | 0.036    | 1.09219191  | 0.051       | 3.125954198 |             |
| 0.118   |          | 2.73706 | 0.034    | 1.011288805 | 0.042       | 2.507633588 |             |
| 0.099   |          | 2.01478 | 0.03     | 0.849482596 | -0.047      | -3.60687023 |             |
| 0.112   |          | 2.50897 | 0.03     | 0.849482596 | 0.042       | 2.507633588 |             |
| 0.109   |          | 2.39493 | 0.03     | 0.849482596 | 0.061       | 3.812977099 |             |
| 0.122   |          | 2.88912 | 0.044    | 1.415804327 | 0.042       | 2.507633588 |             |
| 0.12    |          | 2.81309 | 0.038    | 1.173095014 | 0.05        | 3.057251908 |             |

## Adrenal cholesterol

|         | OD value | umol/l   | mg/ml   | umol/g  | mean    | p value |
|---------|----------|----------|---------|---------|---------|---------|
| control | 0.202    | 525.3333 | 31.9569 | 16.4388 | 10.9105 |         |
|         | 0.206    | 538.6667 | 32.6759 | 16.4851 |         |         |
|         | 0.146    | 338.6667 | 29.0806 | 11.6458 |         |         |
|         | 0.145    | 335.3333 | 32.6759 | 10.2624 |         |         |
|         | 0.19     | 485.3333 | 41.6127 | 11.6631 |         |         |
|         | 0.158    | 378.6667 | 38.1202 | 9.9335  |         |         |
|         | 0.119    | 248.6667 | 35.244  | 7.05558 |         |         |
|         | 0.117    | 242      | 32.7786 | 7.38286 |         |         |
|         | 0.127    | 275.3333 | 33.6004 | 8.19434 |         |         |
|         | 0.154    | 365.3333 | 36.3739 | 10.0438 |         |         |
| PCE (H) | 0.176    | 438.6667 | 46.4407 | 9.44574 | 14.0438 | 0.04731 |
|         | 0.163    | 395.3333 | 46.9543 | 8.41954 |         |         |
|         | 0.229    | 615.3333 | 39.0447 | 15.7597 |         |         |
|         | 0.349    | 1015.333 | 54.3503 | 18.6813 |         |         |
|         | 0.223    | 595.3333 | 35.1412 | 16.9412 |         |         |
|         | 0.235    | 635.3333 | 43.359  | 14.6529 |         |         |
|         | 0.174    | 432      | 36.1685 | 11.9441 |         |         |
|         | 0.232    | 625.3333 | 40.0719 | 15.6053 |         |         |
|         | 0.171    | 422      | 31.3405 | 13.465  |         |         |
|         | 0.187    | 475.3333 | 30.6215 | 15.5229 |         |         |

## pyroptosis related genes mRNA

| CT value | GAPDH  | NLRP3        | caspase1     | IL-1 $\beta$ |
|----------|--------|--------------|--------------|--------------|
| control  | 24.918 | 28.875       | 31.743       | 28.563       |
|          | 24.644 | 29.314       | 33.768       | 29.478       |
|          | 25.747 | 29.947       | 32.689       | 30.491       |
|          | 24.687 | 29.283       | 31.476       | 30.626       |
|          | 25.994 | 30.955       | 33.202       | 31.288       |
|          | 24.800 | Undetermined | Undetermined | Undetermined |
|          | 29.352 | 33.044       | 33.791       | 34.662       |
|          | 26.456 | 30.568       | 34.336       | 30.927       |
|          | 25.613 | 29.422       | 34.369       | 30.233       |
|          | 25.943 | 30.934       | 31.532       | 30.348       |
| PCE (H)  | 25.931 | 29.368       | 33.183       | 30.690       |
|          | 26.232 | 30.120       | 32.226       | 30.757       |
|          | 25.866 | 30.183       | 32.230       | 30.936       |
|          | 26.584 | 30.546       | 32.964       | 30.559       |
|          | 27.677 | 30.689       | 32.907       | 32.936       |
|          | 26.499 | 29.935       | 31.137       | Undetermined |
|          | 26.997 | 30.655       | Undetermined | 31.239       |
|          | 25.224 | 29.732       | 32.560       | 30.000       |

## Steroid synthase

| CT value    | gapdh       | StAR        | P450SCC     | 3 $\beta$ -hsd | P450C11     | P450c21     |             |
|-------------|-------------|-------------|-------------|----------------|-------------|-------------|-------------|
| control     | 26.70980072 | 23.5342083  | 24.82452202 | 22.76723671    | 24.58964348 | 19.43453407 |             |
|             | 26.76150894 | 23.74964523 | 24.96427917 | 23.24964333    | 24.32879829 | 18.46725082 |             |
|             | 27.47513199 | 24.88536072 | 25.77208328 | 23.85793495    | 24.9043026  | 18.41869736 |             |
|             | 26.94939232 | 24.11428833 | 25.50727272 | 23.5714798     | 24.41363716 | 19.77957726 |             |
|             | 28.25749397 | 25.53101921 | 26.60148239 | 24.71138       | 25.35650063 | 21.13745499 |             |
|             | 29.00542068 | 27.07532692 | 28.23365784 | 26.26041412    | 26.94841194 | 20.55815506 |             |
|             | 28.92080498 | 26.92521667 | 27.68964195 | 25.63116074    | 26.51814461 | 20.43658638 |             |
|             | 27.96419525 | 25.55089569 | 26.81922722 | 25.24570656    | 25.88132095 | 19.86100769 |             |
|             | PCE (H)     | 27.25138283 | 25.2145443  | 25.96102676    | 24.90998077 | 24.80116501 | 20.00205231 |
|             |             | 27.25397873 | 24.83982582 | 26.14554977    | 24.84861565 | 24.5789505  | 19.68139076 |
| 26.68039894 |             | 24.38255119 | 25.45675659 | 23.98752403    | 24.88483658 | 20.2689991  |             |
| 27.56822777 |             | 24.98369598 | 25.95149231 | 24.94028664    | 24.48167801 | 19.83727837 |             |
| 28.52040482 |             | 26.93882942 | 27.63225937 | 25.5931015     | 26.57647896 | 19.25886154 |             |
| 26.25342178 |             | 24.29094315 | 25.48207512 | 23.44635582    | 24.82446671 | 20.37667847 |             |
| 28.77059174 |             | 26.32820435 | 27.66102562 | 25.23737526    | 25.61654854 | 20.68032951 |             |
| 26.21481133 |             | 24.04792023 | 25.42037773 | 23.90733337    | 24.10817909 | 19.93966484 |             |

## PW24

### Serum cholesterol

|         | OD     | TCH    | OD(A-B) | HDL-C  | OD (A-B) | LDL-C  |        |
|---------|--------|--------|---------|--------|----------|--------|--------|
| control | 0.1340 | 2.2052 | 0.0100  | 0.7364 | 0.0580   | 1.1918 |        |
|         | 0.1380 | 2.3032 | 0.0040  | 0.2455 | 0.0900   | 1.9397 |        |
|         | 0.1020 | 1.4211 | 0.0090  | 0.6545 | 0.0800   | 1.7060 |        |
|         | 0.0930 | 1.2006 | 0.0070  | 0.4909 | 0.0510   | 1.0283 |        |
|         | 0.1100 | 1.6172 | 0.0020  | 0.0818 | 0.0620   | 1.2853 |        |
|         | 0.1110 | 1.6417 | 0.0120  | 0.9000 | 0.0340   | 0.6310 |        |
|         | 0.1240 | 1.9602 | 0.0110  | 0.8182 | 0.0520   | 1.0516 |        |
|         | 0.1250 | 1.9847 | 0.0010  | 0.0000 | 0.0600   | 1.2386 |        |
|         | 0.0990 | 1.3476 | 0.0060  | 0.4091 | 0.0610   | 1.2620 |        |
|         | 0.1510 | 2.6218 | 0.0090  | 0.6545 | 0.0290   | 0.5141 |        |
|         | 0.1050 | 1.4946 | 0.0050  | 0.3273 | 0.0810   | 1.7293 |        |
|         | 0.1200 | 1.8622 | 0.0100  | 0.7364 | 0.0510   | 1.0283 |        |
|         | PCE(H) | 0.1250 | 1.9847  | 0.0080 | 0.5727   | 0.0760 | 1.6125 |
|         |        | 0.1110 | 1.6417  | 0.0020 | 0.0818   | 0.0680 | 1.4255 |
|         |        | 0.1490 | 2.5727  | 0.0120 | 0.9000   | 0.0890 | 1.9163 |
| 0.1480  |        | 2.5482 | 0.0090  | 0.6545 | 0.1420   | 3.1549 |        |
| 0.1240  |        | 1.9602 | 0.0070  | 0.4909 | 0.0520   | 1.0516 |        |
| 0.1450  |        | 2.4747 | 0.0110  | 0.8182 | 0.0600   | 1.2386 |        |
| 0.1550  |        | 2.7198 | 0.0130  | 0.9818 | 0.0710   | 1.4957 |        |
| 0.1410  |        | 2.3767 | 0.0110  | 0.8182 | 0.0600   | 1.2386 |        |
| 0.1300  |        | 2.1072 | 0.0050  | 0.3273 | 0.1200   | 2.6408 |        |
| 0.0980  |        | 1.3231 | 0.0190  | 1.4727 | 0.0720   | 1.5190 |        |
| 0.1280  |        | 2.0582 | 0.0060  | 0.4091 | 0.1670   | 3.7391 |        |
| 0.1330  |        | 2.1807 | 0.0060  | 0.4091 | 0.2870   | 6.5435 |        |

#### pyroptosis related genes mRNA

| CT value | GAPDH  | NLRP3  | CASPAS1 | IL-1B  |        |
|----------|--------|--------|---------|--------|--------|
| control  | 18.732 | 29.228 | 24.330  | 25.420 |        |
|          | 19.223 | 29.093 | 25.083  | 25.451 |        |
|          | 20.811 | 29.647 | 25.909  | 25.837 |        |
|          | 19.051 | 29.580 | 25.113  | 25.490 |        |
|          | 19.161 | 27.983 | 24.096  | 25.695 |        |
|          | 20.378 | 29.473 | 24.459  | 26.828 |        |
|          | 18.027 | 28.283 | 24.557  | 24.982 |        |
|          | 19.846 | 28.603 | 27.977  | 25.530 |        |
|          | 20.088 | 28.761 | 27.572  | 25.100 |        |
|          | 18.261 | 27.813 | 24.952  | 28.201 |        |
|          | 20.604 | 29.443 | 25.893  | 26.964 |        |
|          | 20.713 | 28.228 | 24.601  | 20.517 |        |
|          | PCE(H) | 19.502 | 28.619  | 24.118 | 25.244 |
|          |        | 19.024 | 27.830  | 24.348 | 25.405 |
|          |        | 19.889 | 27.748  | 24.652 | 26.275 |
| 18.869   |        | 27.479 | 24.521  | 25.552 |        |
| 19.562   |        | 28.188 | 24.518  | 25.815 |        |
| 19.428   |        | 28.659 | 25.167  | 25.740 |        |
| 19.273   |        | 28.579 | 24.873  | 26.251 |        |
| 19.726   |        | 28.423 | 25.362  | 25.036 |        |
| 20.571   |        | 29.388 | 25.118  | 25.917 |        |
| 20.364   |        | 29.712 | 24.266  | 25.831 |        |
| 19.409   |        | 28.175 | 23.796  | 24.977 |        |
| 19.410   |        | 28.482 | 23.952  | 25.130 |        |

Steroid synthase

| CT value | GAPDH       | STAR        | P450SCC     | 3B-HSD      | P450C11     | P450c21 |
|----------|-------------|-------------|-------------|-------------|-------------|---------|
| control  | 20.47471619 | 17.53425789 | 17.43202782 | 17.15011978 | 23.87905502 | 17.4634 |
|          | 20.99554634 | 18.47706795 | 17.97569275 | 17.6924324  | 24.757761   | 17.9385 |
|          | 22.31005287 | 20.02508163 | 19.38490868 | 19.51009369 | 24.70849228 | 19.1671 |
|          | 20.86128998 | 17.88785553 | 17.77908707 | 17.28054047 | 25.43833733 | 17.8115 |
|          | 20.89234734 | 18.93950462 | 18.05666161 | 17.45256805 | 25.2241478  | 18.3788 |
|          | 21.68744278 | 19.12591553 | 18.62331009 | 18.81793976 | 25.2084713  | 19.9348 |
|          | 20.47610855 | 17.97405434 | 17.8068161  | 16.83669281 | 24.11563301 | 17.6898 |
|          | 21.47116661 | 18.7313385  | 18.93245888 | 18.28665733 | 25.08877182 | 18.5037 |
| PCE (H)  | 20.44626236 | 17.66409111 | 17.61244965 | 17.41981506 | 24.7925663  | 17.8768 |
|          | 20.0471611  | 17.20898438 | 16.9842968  | 16.89297676 | 24.64724541 | 17.5451 |
|          | 20.68138123 | 18.32073021 | 18.02910423 | 17.87515831 | 23.90757942 | 18.8338 |
|          | 19.88544655 | 17.45817566 | 17.12493706 | 16.92728233 | 24.21875    | 17.1458 |
|          | 20.71201897 | 18.70160866 | 18.34869194 | 18.01052856 | 24.47767067 | 18.1102 |
|          | 20.43777084 | 18.48514938 | 17.8194313  | 17.5013752  | 24.79891968 | 17.5878 |
|          | 20.53130531 | 18.18426514 | 17.86375809 | 17.44357681 | 24.92172432 | 17.9534 |
|          | 20.96166611 | 18.51538658 | 18.35680962 | 18.08192825 | 24.25847626 | 18.3281 |

### Adrenal cholesterol

|         | OD      | umol/g      | mean   | P Value |             |         |             |
|---------|---------|-------------|--------|---------|-------------|---------|-------------|
| control | 0.0570  | 10.57610707 | 8.5468 |         |             |         |             |
|         | 0.0784  | 12.52579874 |        |         |             |         |             |
|         | 0.0310  | 5.577724881 |        |         |             |         |             |
|         | 0.0467  | 9.29040274  |        |         |             |         |             |
|         | 0.0541  | 7.893849343 |        |         |             |         |             |
|         | 0.0800  | 10.8783978  |        |         |             |         |             |
|         | 0.0405  | 8.033011893 |        |         |             |         |             |
|         | 0.0696  | 11.59512742 |        |         |             |         |             |
|         | 0.0213  | 4.32835249  |        |         |             |         |             |
|         | 0.0406  | 4.769673276 |        |         |             |         |             |
|         | PCE (H) | 0.0990      |        |         | 10.29280815 | 13.6418 | 0.038004089 |
|         |         | 0.0440      |        |         | 6.274158232 |         |             |
|         |         | 0.1425      |        |         | 15.9556426  |         |             |
|         |         | 0.2821      |        |         | 20.02531361 |         |             |
| 0.1626  |         | 19.63647748 |        |         |             |         |             |
| 0.0473  |         | 7.051897792 |        |         |             |         |             |
| 0.0951  |         | 12.85271466 |        |         |             |         |             |
| 0.0543  |         | 8.213643849 |        |         |             |         |             |
| 0.2009  |         | 26.09098803 |        |         |             |         |             |
| 0.0477  |         | 10.02454386 |        |         |             |         |             |

### Adrenal SR-B1

| CT Value      | GAPDH  | SRB1         | CT Value      | GAPDH  | SRB1         | CT Value      | GAPDH  | SRB1   |
|---------------|--------|--------------|---------------|--------|--------------|---------------|--------|--------|
| control(GD20) | 19.937 | 20.463       | control(PW12) | 21.597 | 18.401       | control(PW24) | 18.732 | 16.116 |
|               | 21.175 | 22.676       |               | 21.791 | 18.828       |               | 19.223 | 17.385 |
|               | 20.088 | 20.647       |               | 24.464 | 21.974       |               | 20.811 | 19.388 |
|               | 19.904 | 19.964       |               | 20.733 | 18.107       |               | 19.051 | 16.689 |
|               | 19.979 | 19.755       |               | 24.132 | 21.587       |               | 19.161 | 18.226 |
|               | 18.977 | 19.657       |               | 20.258 | 17.493       |               | 20.378 | 18.406 |
|               | 21.340 | 20.891       |               | 23.599 | 20.996       |               | 18.027 | 16.780 |
|               | 20.937 | 19.952       |               | 21.026 | 18.787       |               | 19.846 | 17.002 |
|               | 19.268 | 18.723       |               | 21.304 | 18.965       |               | 20.088 | 19.037 |
|               | 20.520 | 19.783       |               | 22.697 | 19.556       |               | 18.261 | 15.778 |
| PCE(L)        | 21.157 | 21.463       |               | 23.515 | 20.217       |               | 20.604 | 18.223 |
|               | 22.219 | 22.119       |               | 22.276 | 19.866       |               | 20.713 | 19.365 |
|               | 20.990 | 21.783       | PCE(H)        | 20.334 | 16.092       | PCE(H)        | 19.502 | 17.148 |
|               | 21.129 | 20.029       |               | 20.799 | 16.752       |               | 19.024 | 16.660 |
|               | 21.364 | 21.498       |               | 22.122 | 17.960       |               | 19.889 | 17.144 |
|               | 22.443 | 22.264       |               | 21.876 | 17.892       |               | 18.869 | 16.614 |
|               | 21.243 | 20.662       |               | 22.436 | 18.506       |               | 19.562 | 16.625 |
|               | 21.114 | 21.164       |               | 16.322 | Undetermined |               | 19.428 | 17.306 |
|               | 21.989 | 21.142       |               | 20.429 | 16.241       |               | 19.273 | 17.198 |
|               | 19.782 | 21.742       |               | 20.011 | 16.072       |               | 19.726 | 17.643 |
| PCE(M)        | 23.960 | 22.879       |               | 20.696 | 16.617       |               | 20.571 | 17.700 |
|               | 22.075 | 21.191       |               | 21.906 | 17.945       |               | 20.364 | 18.201 |
|               | 22.951 | 22.154       |               | 21.780 | 17.674       |               | 19.409 | 16.749 |
|               | 21.391 | 21.036       |               | 22.074 | 17.832       |               | 19.410 | 17.289 |
|               | 24.099 | 22.920       |               |        |              |               |        |        |
|               | 23.138 | Undetermined |               |        |              |               |        |        |
|               | 23.964 | 22.900       |               |        |              |               |        |        |
|               | 23.964 | Undetermined |               |        |              |               |        |        |
|               | 23.091 | 22.117       |               |        |              |               |        |        |
|               | 24.142 | 24.242       |               |        |              |               |        |        |
| PCE(H)        | 23.774 | Undetermined |               |        |              |               |        |        |
|               | 23.616 | Undetermined |               |        |              |               |        |        |
|               | 24.533 | 22.989       |               |        |              |               |        |        |
|               | 22.327 | 20.959       |               |        |              |               |        |        |
|               | 24.518 | 22.962       |               |        |              |               |        |        |
|               | 23.923 | 22.596       |               |        |              |               |        |        |
|               | 22.540 | 21.391       |               |        |              |               |        |        |
|               | 24.274 | 22.815       |               |        |              |               |        |        |
|               | 22.462 | 21.325       |               |        |              |               |        |        |
|               | 22.609 | 21.201       |               |        |              |               |        |        |

### Enrichment of H3K9ac, H3K14ac and H3K27ac in the promoter region of SR-B1 on GD20, PW12 and PW24

| GD20    | input(ct) | H3K9(ct)  | H3K9 level  | PW12    | input(ct) | H3K9(ct)  | H3K9 level  | PW24    | input(ct) | H3K9(ct)  | H3K9 level  |
|---------|-----------|-----------|-------------|---------|-----------|-----------|-------------|---------|-----------|-----------|-------------|
| control | 11.294    | 14.428    | 3.13397     | control | 9.179     | 16.969    | 7.789       | control | 9.406     | 13.044    | 3.638       |
|         | 11.153    | 14.449    | 3.29654     |         | 9.041     | 16.816    | 7.776       |         | 9.309     | 13.116    | 3.807       |
|         | 11.117    | 14.592    | 3.47532     |         | 9.121     | 17.056    | 7.935       |         | 9.294     | 13.036    | 3.742       |
| PCE(H)  | 11.708    | 15.679    | 3.97121     | PCE(H)  | 10.747    | 17.067    | 6.320       | PCE(H)  | 10.624    | 14.152    | 3.527       |
|         | 11.737    | 15.668    | 3.93116     |         | 10.007    | 17.219    | 7.212       |         | 10.654    | 14.668    | 4.014       |
|         | 11.878    | 15.699    | 3.82116     |         | 10.215    | 17.134    | 6.919       |         | 10.575    | 14.054    | 3.479       |
|         | input(ct) | H3K14(ct) | H3K14 level |         | input(ct) | H3K14(ct) | H3K14 level |         | input(ct) | H3K14(ct) | H3K14 level |
| control | 11.294    | 16.119    | 4.82538     | control | 9.179     | 16.411    | 7.231       | control | 9.406     | 14.152    | 4.746       |
|         | 11.153    | 15.981    | 4.82878     |         | 9.041     | 16.462    | 7.421       |         | 9.309     | 14.968    | 5.659       |
|         | 11.117    | 16.130    | 5.01263     |         | 9.121     | 16.520    | 7.400       |         | 9.294     | 15.054    | 5.760       |
| PCE(H)  | 11.708    | 15.139    | 3.43113     | PCE(H)  | 10.747    | 16.754    | 6.007       | PCE(H)  | 10.624    | 14.936    | 4.311       |
|         | 11.737    | 15.411    | 3.67432     |         | 10.007    | 16.918    | 6.911       |         | 10.654    | 14.831    | 4.177       |
|         | 11.878    | 15.390    | 3.5118      |         | 10.215    | 16.450    | 6.235       |         | 10.575    | 14.809    | 4.234       |
|         | input(ct) | H3K27(ct) | H3K27 level |         | input(ct) | H3K27(ct) | H3K27 level |         | input(ct) | H3K27(ct) | H3K27 level |
| control | 11.294    | 14.881    | 3.58781     | control | 9.179     | 17.612    | 8.433       | control | 9.406     | 13.044    | 3.638       |
|         | 11.153    | 14.696    | 3.54333     |         | 9.041     | 17.222    | 8.181       |         | 9.309     | 13.116    | 3.807       |
|         | 11.117    | 14.870    | 3.75309     |         | 9.121     | 17.227    | 8.106       |         | 9.294     | 13.036    | 3.742       |
| PCE(H)  | 11.708    | 16.105    | 4.39782     | PCE(H)  | 10.747    | 16.823    | 6.075       | PCE(H)  | 10.624    | 14.898    | 4.273       |
|         | 11.737    | 16.230    | 4.49313     |         | 10.007    | 16.618    | 6.611       |         | 10.654    | 14.832    | 4.179       |
|         | 11.878    | 16.428    | 4.55024     |         | 10.215    | 16.622    | 6.407       |         | 10.575    | 14.895    | 4.320       |
|         | input(ct) | IgG(ct)   | IgG level   |         | input(ct) | IgG(ct)   | IgG level   |         | input(ct) | IgG(ct)   | IgG level   |
| control | 11.294    | 24.546    | 13.2528     | control | 9.179     | 22.921    | 13.742      | control | 9.406     | 25.594    | 16.188      |
|         | 11.153    | 24.488    | 13.3356     |         | 9.041     | 22.781    | 13.740      |         | 9.309     | 26.433    | 17.124      |
|         | 11.117    | 24.487    | 13.3702     |         | 9.121     | 23.435    | 14.315      |         | 9.294     | 24.676    | 15.382      |
| PCE(H)  | 11.708    | 22.818    | 11.1105     | PCE(H)  | 10.747    | 23.844    | 13.096      | PCE(H)  | 10.624    | 22.859    | 12.234      |
|         | 11.737    | 22.874    | 11.1376     |         | 10.007    | 25.916    | 15.909      |         | 10.654    | 22.215    | 11.561      |
|         | 11.878    | 22.996    | 11.1182     |         | 10.215    | 25.936    | 15.721      |         | 10.575    | 22.978    | 12.403      |

The concentration of serum corticosterone on GD20

| GD20    | Y值(OD) | X值        | C*50-fold dilution<br>(ng/ml) | mean (ng/ml) | SD          | SEM          | P value     |           |            |            |             |           |
|---------|--------|-----------|-------------------------------|--------------|-------------|--------------|-------------|-----------|------------|------------|-------------|-----------|
| control | 1.703  | 7.676708  | 383.8354                      | 425.8068154  | 66.7201269  | 13.504833275 |             |           |            |            |             |           |
|         | 1.773  | 6.764577  | 338.22885                     |              |             |              |             |           |            |            |             |           |
|         | 1.575  | 9.556839  | 477.84445                     |              |             |              |             |           |            |            |             |           |
|         | 1.562  | 9.765273  | 488.26365                     |              |             |              |             |           |            |            |             |           |
|         | 1.676  | 8.049145  | 402.45725                     |              |             |              |             |           |            |            |             |           |
|         | 1.615  | 8.926962  | 446.8431                      |              |             |              |             |           |            |            |             |           |
|         | 1.625  | 8.786799  | 439.33995                     |              |             |              |             |           |            |            |             |           |
|         | 1.711  | 7.568641  | 378.42205                     |              |             |              |             |           |            |            |             |           |
|         | 1.471  | 11.328169 | 566.40845                     |              |             |              |             |           |            |            |             |           |
|         | 1.657  | 8.318591  | 415.92955                     |              |             |              |             |           |            |            |             |           |
|         | 1.634  | 8.653242  | 432.6621                      |              |             |              |             |           |            |            |             |           |
|         | 1.605  | 9.089016  | 454.4508                      |              |             |              |             |           |            |            |             |           |
|         | 1.818  | 6.21576   | 310.788                       |              |             |              |             |           |            |            |             |           |
|         | PCE(L) | 1.589     | 9.336327                      |              |             |              |             | 466.81635 | 506.907655 | 71.1250463 | 21.44500835 | 0.0105171 |
|         |        | 1.65      | 8.419442                      |              |             |              |             | 420.9721  |            |            |             |           |
| 1.45    |        | 11.71697  | 585.8485                      |              |             |              |             |           |            |            |             |           |
| 1.506   |        | 10.704484 | 535.2242                      |              |             |              |             |           |            |            |             |           |
| 1.831   |        | 6.062303  |                               |              |             |              |             |           |            |            |             |           |
| 1.707   |        | 7.622546  | 381.1273                      |              |             |              |             |           |            |            |             |           |
| 1.579   |        | 9.493468  | 474.6734                      |              |             |              |             |           |            |            |             |           |
| 1.44    |        | 11.906136 | 595.3068                      |              |             |              |             |           |            |            |             |           |
| 1.517   |        | 10.514469 | 525.72345                     |              |             |              |             |           |            |            |             |           |
| 1.536   |        | 10.192734 | 509.6367                      |              |             |              |             |           |            |            |             |           |
| 1.463   |        | 11.474955 | 573.74775                     |              |             |              |             |           |            |            |             |           |
| PCE(M)  |        | 1.485     | 11.075133                     | 553.75665    | 603.5097333 | 144.452179   | 41.69975232 | 0.0005595 |            |            |             |           |
|         |        | 1.486     | 11.057244                     | 552.8622     |             |              |             |           |            |            |             |           |
|         |        | 1.546     | 10.026607                     | 501.33035    |             |              |             |           |            |            |             |           |
|         |        | 1.562     | 9.765273                      | 488.26365    |             |              |             |           |            |            |             |           |
|         | 1.436  | 11.982547 | 599.12735                     |              |             |              |             |           |            |            |             |           |
|         | 1.431  | 12.078667 | 603.93335                     |              |             |              |             |           |            |            |             |           |
|         | 1.368  | 13.35053  | 667.5265                      |              |             |              |             |           |            |            |             |           |
|         | 1.308  | 14.676754 | 733.8377                      |              |             |              |             |           |            |            |             |           |
|         | 1.215  | 16.993489 | 849.67445                     |              |             |              |             |           |            |            |             |           |
|         | 1.528  | 10.327217 | 516.36085                     |              |             |              |             |           |            |            |             |           |
|         | 1.751  | 7.043291  | 352.16455                     |              |             |              |             |           |            |            |             |           |
|         | 1.235  | 16.465584 | 823.2792                      |              |             |              |             |           |            |            |             |           |
|         | PCE(H) | 1.319     | 14.424505                     | 721.22525    | 628.8691083 | 98.050718    | 28.30480421 | 7.073E-06 |            |            |             |           |
|         |        | 1.421     | 12.272954                     | 613.6477     |             |              |             |           |            |            |             |           |
|         |        | 1.657     | 8.318591                      | 415.92955    |             |              |             |           |            |            |             |           |
| 1.584   |        | 9.414646  | 470.7323                      |              |             |              |             |           |            |            |             |           |
| 1.406   |        | 12.569614 | 628.4807                      |              |             |              |             |           |            |            |             |           |
| 1.385   |        | 12.99583  | 649.7915                      |              |             |              |             |           |            |            |             |           |
| 1.355   |        | 13.627829 | 681.39145                     |              |             |              |             |           |            |            |             |           |
| 1.408   |        | 12.529691 | 626.48455                     |              |             |              |             |           |            |            |             |           |
| 1.333   |        | 14.109531 | 705.47655                     |              |             |              |             |           |            |            |             |           |
| 1.344   |        | 13.866692 | 693.3346                      |              |             |              |             |           |            |            |             |           |
| 1.302   |        | 14.816156 | 740.8078                      |              |             |              |             |           |            |            |             |           |
| 1.436   |        | 11.982547 | 599.12735                     |              |             |              |             |           |            |            |             |           |

GR binding to SREBP1 promoter region on GD20

| GD20    | input(ct) | GR(ct) |         | GR binding to SREBP1 promoter<br>region |
|---------|-----------|--------|---------|-----------------------------------------|
| control | 12.282    | 19.493 | 7.21139 | 0.67%                                   |
|         | 12.452    | 20.021 | 7.56922 | 0.53%                                   |
|         | 12.411    | 19.981 | 7.56964 | 0.53%                                   |
| PCE(H)  | 13.673    | 20.551 | 6.87779 | 0.85%                                   |
|         | 13.737    | 20.825 | 7.08834 | 0.73%                                   |
|         | 13.834    | 20.732 | 6.89828 | 0.84%                                   |

## Cell experiment results

### Cytotoxicity of cholesterol by MTS assays

|    | control | 24h   | 48h   | 72h   |    | control | 10 $\mu$ M cholesterol | 20 $\mu$ M cholesterol | 40 $\mu$ M cholesterol |
|----|---------|-------|-------|-------|----|---------|------------------------|------------------------|------------------------|
| OD | 0.573   | 0.531 | 0.534 | 0.360 | OD | 0.567   | 0.555                  | 0.616                  | 0.527                  |
|    | 0.644   | 0.602 | 0.544 | 0.413 |    | 0.582   | 0.527                  | 0.633                  | 0.611                  |
|    | 0.634   | 0.592 | 0.492 | 0.368 |    | 0.510   | 0.525                  | 0.635                  | 0.629                  |
|    | 0.625   | 0.583 | 0.542 | 0.393 |    | 0.459   | 0.479                  | 0.455                  | 0.650                  |
|    | 0.548   | 0.606 | 0.589 | 0.373 |    | 0.457   | 0.476                  | 0.500                  | 0.539                  |
|    | 0.536   | 0.594 | 0.584 | 0.376 |    | 0.522   | 0.437                  | 0.735                  | 0.530                  |
|    | 0.589   | 0.581 | 0.522 | 0.412 |    | 0.427   | 0.462                  | 0.448                  | 0.504                  |
|    |         |       |       |       |    | 0.611   | 0.441                  | 0.423                  | 0.613                  |
|    |         |       |       |       |    | 0.571   | 0.468                  | 0.437                  | 0.508                  |

### pyroptosis related genes and Steroid synthase mRNA induced by cholesterol

| CT                     | GAPDH    | NLRP3    | caspace1 | IL-1 $\beta$ |  | CT                     | gapdh       | star        | gapdh       | P450scc     |
|------------------------|----------|----------|----------|--------------|--|------------------------|-------------|-------------|-------------|-------------|
| control                | 18.29923 | 33.93936 | 25.4532  | 27.0312      |  | control                | 17.55750237 | 21.74093437 | 17.13436508 | 21.71754456 |
|                        | 17.6231  | 32.99538 | 25.079   | 27.0702      |  |                        | 17.08610916 | 21.3894043  | 17.49586678 | 21.76583099 |
|                        | 19.51553 | 34.93497 | 27.2808  | 29.0965      |  |                        | 19.21323586 | 23.98319817 | 19.32333183 | 23.89523697 |
|                        | 19.53727 | 34.34325 | 27.101   | 27.7207      |  |                        | 18.9209137  | 23.92643738 | 19.33498001 | 23.93972206 |
|                        | 16.95096 | 32.24385 | 23.8466  | 25.841       |  |                        | 16.50878716 | 21.25391006 | 16.53042221 | 21.18402481 |
|                        | 16.82304 | 32.16024 | 24.1286  | 25.9698      |  |                        | 16.54007721 | 21.10219383 | 16.52265167 | 21.27386665 |
| 10 $\mu$ M cholesterol | 19.92429 | 33.47204 | 26.7637  | 28.1832      |  | 10 $\mu$ M cholesterol | 19.35540771 | 23.75626183 | 19.63576508 | 23.98295212 |
|                        | 19.56346 | 33.65534 | 26.8559  | 28.6435      |  |                        | 19.01935005 | 23.69089317 | 19.04005432 | 23.88620377 |
|                        | 20.31212 | 33.82973 | 27.8334  | 26.9367      |  |                        | 20.09096146 | 24.58085251 | 19.99766541 | 24.75643158 |
|                        | 20.35257 | 33.79848 | 27.3615  | 27.0628      |  |                        | 20.17528152 | 24.66859055 | 20.10528374 | 24.81220055 |
|                        | 18.88534 | 34.28744 | 25.5998  | 27.1859      |  |                        | 18.30836678 | 23.08791733 | 18.76272392 | 23.30116653 |
|                        | 18.73242 | 34.77179 | 25.9824  | 26.9715      |  |                        | 18.49011612 | 23.18108368 | 18.83977318 | 23.46994781 |
| 20 $\mu$ M cholesterol | 19.43949 | 34.42577 | 26.5573  | 28.3031      |  | 20 $\mu$ M cholesterol | 19.6554184  | 24.91193962 | 19.68561172 | 24.90226746 |
|                        | 19.62468 | 33.96172 | 26.4453  | 28.5635      |  |                        | 19.82545471 | 24.74606705 | 19.87798119 | 24.56402588 |
|                        | 20.43732 | 35.02811 | 27.147   | 27.3297      |  |                        | 19.54091835 | 24.93455315 | 19.45327759 | 24.52190208 |
|                        | 20.33547 | 35.19829 | 27.3956  | 27.7346      |  |                        | 19.45770454 | 24.56183434 | 19.25424957 | 23.97173882 |
|                        | 18.52931 | 33.76357 | 25.3191  | 27.8174      |  |                        | 18.55336571 | 23.28997421 | 18.51654053 | 23.3660202  |
|                        | 18.56579 | 32.83501 | 25.5668  | 27.6184      |  |                        | 18.63993263 | 23.23032646 | 18.27906418 | 23.41304398 |
| 40 $\mu$ M cholesterol | 18.31875 | 33.56663 | 25.5758  | 27.9737      |  | 40 $\mu$ M cholesterol | 18.08802795 | 23.07123756 | 19.0236969  | 24.73491859 |
|                        | 18.54763 | 34.08464 | 25.5369  | 27.7234      |  |                        | 18.16338348 | 23.15242386 | 19.28524399 | 24.61812782 |
|                        | 18.74778 | 34.49428 | 25.7112  | 28.2856      |  |                        | 18.44371796 | 23.2475071  | 18.77781677 | 23.5897377  |
|                        | 18.81338 | 34.14453 | 25.9492  | 28.1294      |  |                        | 18.52975845 | 23.47258835 | 18.53525543 | 23.08977699 |
|                        | 19.65723 | 33.39845 | 26.4773  | 27.3779      |  |                        | 18.60061569 | 23.67888374 | 18.29201889 | 22.95222855 |
|                        | 19.94422 | 34.00071 | 26.3544  | 27.6035      |  |                        | 18.50408325 | 23.2120285  | 18.10634804 | 23.01398468 |

mRNA expression of StAR and P450scc with transfection in the presence of NLRP3 siRNA

| CT Value                     | GAPDH   | star         |  | GAPDH                        | p450scc     |             |
|------------------------------|---------|--------------|--|------------------------------|-------------|-------------|
| Control                      | 25.6843 | 20.9410954   |  | Control                      | 26.76677132 | 23.00773811 |
|                              | 25.7436 | 20.8671913   |  |                              | 26.50980186 | 22.81729126 |
|                              | 25.9048 | 21.1250401   |  |                              | 26.47048759 | 22.72478676 |
|                              | 25.6717 | 20.9773045   |  |                              | 26.4282074  | 22.63291359 |
|                              | 25.5391 | 21.1249657   |  |                              | 26.33546257 | 22.69720078 |
|                              | 25.8716 | 21.3746777   |  |                              | 26.40421295 | 22.43786049 |
|                              | 25.9903 | 21.5262146   |  |                              | 26.43598938 | 22.79540062 |
|                              | 26.0218 | 21.5638351   |  |                              | 26.408144   | 22.58060837 |
| 40µM cholesterol             | 25.6198 | 21.5398006   |  | 40µM cholesterol             | 26.08885384 | 22.72357178 |
|                              | 25.9315 | Undetermined |  |                              | 26.07881737 | 22.8042984  |
|                              | 25.498  | 21.3993549   |  |                              | 25.68997192 | 22.6420784  |
|                              | 25.4859 | 21.473135    |  |                              | 25.62738228 | 22.5819664  |
|                              | 25.4331 | 21.473259    |  |                              | 25.61900711 | 22.5177002  |
|                              | 25.4237 | 21.5859299   |  |                              | 25.76694489 | 22.44528198 |
|                              | 25.5854 | 21.9653816   |  |                              | 25.91734123 | 22.96069527 |
|                              | 25.9311 | Undetermined |  |                              | 25.76708794 | 22.61360931 |
| NLRP3 siRNA                  | 26.5684 | 21.3882236   |  | NLRP3 siRNA                  | 25.97465134 | 22.42935562 |
|                              | 26.1055 | 21.1454983   |  |                              | 25.98221779 | 22.70117569 |
|                              | 26.067  | 21.07938     |  |                              | 25.99841499 | 22.69368935 |
|                              | 26.0505 | 21.1701851   |  |                              | 25.81901932 | 22.67439461 |
|                              | 26.1511 | 21.0818748   |  |                              | 25.94172668 | 22.57903862 |
|                              | 26.2965 | 21.3483696   |  |                              | 25.90717316 | 22.67859268 |
|                              | 26.2568 | 21.3880062   |  |                              | 26.10468483 | 22.62475395 |
|                              | 26.5461 | 21.9376678   |  |                              | 25.89145851 | 22.71029663 |
| 40µM cholesterol+nlrp3 siRNA | 25.6822 | 21.3837929   |  | 40µM cholesterol+nlrp3 siRNA | 26.00885582 | 22.34472656 |
|                              | 25.5792 | 21.4623985   |  |                              | 25.99958801 | 22.37170601 |
|                              | 25.5619 | Undetermined |  |                              | 26.06227493 | 22.33443451 |
|                              | 25.6192 | Undetermined |  |                              | 25.85551834 | 22.29990578 |
|                              | 25.7564 | 21.5206871   |  |                              | 25.86984062 | 22.38780785 |
|                              | 26.16   | 21.5037155   |  |                              | 25.88537788 | 22.33727837 |
|                              | 25.886  | 21.8156719   |  |                              | 25.97057152 | 22.4251709  |
|                              | 25.9334 | 21.7604961   |  |                              | 26.0392704  | 22.96913719 |

SR-B1 expression induced by caffeine and cortisol treatment

| CT Value       | GAPDH  | SR-B1       | CT Value        | GAPDH  | SR-B1  |
|----------------|--------|-------------|-----------------|--------|--------|
| control        | 16.977 | 21.14401627 | control         | 16.646 | 20.003 |
|                | 17.128 | 21.17236328 |                 | 16.497 | 20.296 |
|                | 16.591 | 20.75191498 |                 | 16.705 | 20.864 |
|                | 16.506 | 20.55372238 |                 | 16.601 | 20.487 |
|                | 17.446 | 22.32834053 |                 | 16.929 | 20.536 |
|                | 17.356 | 22.74185753 |                 | 17.139 | 20.571 |
| 0.1µM caffeine | 16.027 | 20.86574059 | 300nM Cortisol  | 16.730 | 20.371 |
|                | 16.266 | 21.02427101 |                 | 16.824 | 20.369 |
|                | 16.164 | 20.78315239 |                 | 17.850 | 21.014 |
|                | 16.648 | 20.65874825 |                 | 17.956 | 21.031 |
|                | 16.522 | 20.49269867 |                 | 17.224 | 21.263 |
|                | 15.872 | 20.51299858 |                 | 17.200 | 21.211 |
| 1µM caffeine   | 16.121 | 21.16020393 | 600nM Cortisol  | 17.050 | 20.124 |
|                | 16.990 | 21.32872543 |                 | 17.242 | 20.129 |
|                | 15.809 | 20.55095406 |                 | 16.902 | 20.039 |
|                | 15.976 | 20.31742477 |                 | 16.978 | 20.257 |
|                | 16.226 | 20.49884224 |                 | 16.733 | 20.270 |
|                | 16.151 | 20.46448708 |                 | 16.512 | 20.208 |
| 10µM caffeine  | 16.658 | 20.88448334 | 1200nM Cortisol | 16.965 | 19.771 |
|                | 16.663 | 20.65411758 |                 | 17.005 | 19.937 |
|                | 16.561 | 20.69150162 |                 | 16.797 | 19.484 |
|                | 16.617 | 20.64207077 |                 | 17.549 | 19.649 |
|                | 16.795 | 20.94201851 |                 | 16.809 | 19.801 |
|                | 16.752 | 20.70279694 |                 | 16.966 | 19.441 |
| 100µM caffeine | 16.421 | 20.46305656 |                 |        |        |
|                | 16.411 | 20.32682419 |                 |        |        |
|                | 16.551 | 20.66360092 |                 |        |        |
|                | 16.509 | 20.38764954 |                 |        |        |
|                | 17.232 | 21.69860039 |                 |        |        |
|                | 17.151 | 21.24321938 |                 |        |        |

The content of cell TCH with transfection in the presence of SR-B1 siRNA



|                          | OD value | TCH (umol/L) | Intracellular protein(mg/ml) | TCH(nmol/mg) |
|--------------------------|----------|--------------|------------------------------|--------------|
| C+C                      | 0.074    | 93           | 6.602465331                  | 14.08564761  |
|                          | 0.077    | 103          | 6.371340524                  | 16.16614268  |
|                          | 0.079    | 109.6666667  | 6.859270673                  | 15.98809435  |
|                          | 0.086    | 133          | 7.347200822                  | 18.10213212  |
|                          | 0.077    | 103          | 6.78222907                   | 15.18674744  |
|                          | 0.079    | 109.6666667  | 7.193117617                  | 15.24605498  |
| c+cho                    | 0.088    | 139.6666667  | 6.422701592                  | 21.74578169  |
|                          | 0.09     | 146.3333333  | 6.551104263                  | 22.3372011   |
|                          | 0.088    | 139.6666667  | 6.807909605                  | 20.5153527   |
|                          | 0.093    | 156.3333333  | 6.910631741                  | 22.6221479   |
|                          | 0.093    | 156.3333333  | 7.116076014                  | 21.96903645  |
|                          | 0.094    | 159.6666667  | 7.475603493                  | 21.35836482  |
| cortisol+cho             | 0.097    | 169.6666667  | 7.552645095                  | 22.46453587  |
|                          | 0.1      | 179.6666667  | 7.424242424                  | 24.2         |
|                          | 0.098    | 173          | 7.270159219                  | 23.79590251  |
|                          | 0.1      | 179.6666667  | 7.39856189                   | 24.28399861  |
|                          | 0.097    | 169.6666667  | 7.989214176                  | 21.23696561  |
|                          | 0.103    | 189.6666667  | 7.552645095                  | 25.11261476  |
| c+SR-B1 siRNA+cho        | 0.084    | 126.3333333  | 6.499743195                  | 19.43666535  |
|                          | 0.085    | 129.6666667  | 6.679506934                  | 19.41261053  |
|                          | 0.083    | 123          | 6.78222907                   | 18.13563044  |
|                          | 0.088    | 139.6666667  | 6.961992809                  | 20.06130579  |
|                          | 0.084    | 126.3333333  | 7.039034412                  | 17.9475374   |
|                          | 0.087    | 136.3333333  | 7.270159219                  | 18.75245496  |
| cortisol+SR-B1 siRNA+cho | 0.088    | 139.6666667  | 7.270159219                  | 19.21095019  |
|                          | 0.089    | 143          | 7.39856189                   | 19.32808053  |
|                          | 0.088    | 139.6666667  | 6.833590139                  | 20.43825629  |
|                          | 0.091    | 149.6666667  | 7.270159219                  | 20.58643589  |
|                          | 0.091    | 149.6666667  | 7.193117617                  | 20.8069261   |
|                          | 0.096    | 166.3333333  | 7.526964561                  | 22.09832822  |

#### The content of cell TCH with cortisol treatment

|                | OD value | TCH (umol/L) | Intracellular protein (mg/ml) | TCH(nmol/mg) |
|----------------|----------|--------------|-------------------------------|--------------|
| control        | 0.082    | 0.783333333  | 0.179578                      | 4.362078503  |
|                | 0.082    | 0.783333333  | 0.210466                      | 3.721899658  |
|                | 0.083    | 0.809444444  | 0.20809                       | 3.889876709  |
|                | 0.083    | 0.809444444  | 0.227098                      | 3.564295786  |
|                | 0.08     | 0.731111111  | 0.239572                      | 3.051738563  |
|                | 0.081    | 0.757222222  | 0.234226                      | 3.232870058  |
| 300nM cortisol | 0.086    | 0.887777778  | 0.20215                       | 4.391678347  |
|                | 0.091    | 1.018333333  | 0.232444                      | 4.38098352   |
|                | 0.095    | 1.122777778  | 0.235414                      | 4.769375559  |
|                | 0.099    | 1.227222222  | 0.229474                      | 5.347979389  |
|                | 0.1      | 1.253333333  | 0.241354                      | 5.192925468  |
|                | 0.101    | 1.279444444  | 0.238978                      | 5.353816855  |
| 600nM cortisol | 0.095    | 1.122777778  | 0.219376                      | 5.11805201   |
|                | 0.089    | 0.966111111  | 0.235414                      | 4.103881295  |
|                | 0.085    | 0.861666667  | 0.235414                      | 3.660218452  |
|                | 0.109    | 1.488333333  | 0.227692                      | 6.536607932  |
|                | 0.117    | 1.697222222  | 0.235414                      | 7.209521193  |
|                | 0.086    | 0.887777778  | 0.230662                      | 3.848825458  |
| 1200nM cortiso | 0.093    | 1.070555556  | 0.213436                      | 5.015815306  |
|                | 0.097    | 1.175        | 0.209872                      | 5.598650606  |
|                | 0.101    | 1.279444444  | 0.193834                      | 6.600722497  |
|                | 0.104    | 1.357777778  | 0.215812                      | 6.291484152  |
|                | 0.108    | 1.462222222  | 0.22294                       | 6.558815027  |
|                | 0.11     | 1.514444444  | 0.234226                      | 6.465740116  |

#### SREBP1/P300 expression with cortisol treatment

| CT Value        | GAPDH     | SREBP1      | P300       |
|-----------------|-----------|-------------|------------|
| control         | 17.926764 | 25.20528603 | 27.9014931 |
|                 | 17.633989 | 25.29555893 | 27.657753  |
|                 | 17.876997 | 26.06103516 | 29.3720589 |
|                 | 17.916428 | 26.83418083 | 29.2428703 |
|                 | 18.479593 | 25.59207535 | 28.1115093 |
|                 | 18.375229 | 25.65142059 | 28.4016037 |
| 300nM cortisol  | 17.992754 | 24.85059738 | 27.9359665 |
|                 | 18.060947 | 25.05620575 | 27.8941212 |
|                 | 18.173199 | 26.24107246 | 28.8421993 |
|                 | 18.146976 | 26.14394569 | 29.0008049 |
|                 | 18.885025 | 26.60834312 | 29.6214199 |
|                 | 18.822741 | 26.60164642 | 30.0110798 |
| 600nM cortisol  | 18.425627 | 25.79636002 | 27.9740105 |
|                 | 18.231054 | 25.63809776 | 28.0548123 |
|                 | 17.745457 | 24.96372414 | 27.8661461 |
|                 | 17.81179  | 24.97377968 | 28.2084675 |
|                 | 17.945351 | 25.03938484 | 27.4999523 |
|                 | 18.01684  | 25.20728874 | 28.0196533 |
| 1200nM cortisol | 18.200954 | 25.27520561 | 27.7736168 |
|                 | 18.26166  | 25.27389145 | 27.9605865 |
|                 | 18.226862 | 25.24097061 | 27.241951  |
|                 | 18.144314 | 25.23304176 | 27.4194775 |
|                 | 17.896912 | 24.76562119 | 27.4729691 |
|                 | 17.991144 | 24.73654556 | 27.8344917 |

Enrichment of H3K14ac in the promoter region of SR-B1

|                 | input(ct)   | H3K9(ct)    |             | H3K9 level  |
|-----------------|-------------|-------------|-------------|-------------|
| control         | 22.74558067 | 29.42102623 | 6.675445557 | 0.9783%     |
|                 | 22.85624886 | 29.52350235 | 6.667253494 | 0.9839%     |
|                 | 22.78751564 | 29.6157608  | 6.828245163 | 0.8800%     |
| 1200nM cortisol | 21.97542381 | 28.74267197 | 6.767248154 | 0.9180%     |
|                 | 22.13698196 | 28.31145096 | 6.174468994 | 1.3845%     |
|                 | 22.20594406 | 28.76506042 | 6.559116364 | 1.0605%     |
|                 | input(ct)   | H3K14(ct)   |             | H3K14 level |
| control         | 22.74558067 | 28.60329628 | 5.857715607 | 1.7245%     |
|                 | 22.85624886 | 28.77150345 | 5.915254593 | 1.6570%     |
|                 | 22.78751564 | 28.66283417 | 5.875318527 | 1.7035%     |
| 1200nM cortisol | 21.97542381 | 27.30326195 | 5.327838135 | 2.4898%     |
|                 | 22.13698196 | 27.62234306 | 5.485361099 | 2.2322%     |
|                 | 22.20594406 | 27.35076141 | 5.144817352 | 2.8265%     |
|                 | input(ct)   | H3K27(ct)   |             | H3K27 level |
| control         | 22.74558067 | 29.91156769 | 7.165987015 | 0.6963%     |
|                 | 22.85624886 | 30.61416245 | 7.757913589 | 0.4620%     |
|                 | 22.78751564 | 31.93647385 | 9.148958206 | 0.1762%     |
| 1200nM cortisol | 21.97542381 | 29.63829803 | 7.662874222 | 0.4935%     |
|                 | 22.13698196 | 29.81866455 | 7.681682587 | 0.4871%     |
|                 | 22.20594406 | 30.14811897 | 7.942174911 | 0.4066%     |
|                 | input(ct)   | IgG(ct)     |             | IgG level   |
| control         | 22.74558067 | 37.23569679 | 14.49011612 | 0.0043%     |
|                 | 22.85624886 | 37.3182888  | 14.46203995 | 0.0044%     |
|                 | 22.78751564 | 37.17285728 | 14.38534164 | 0.0047%     |
| 1200nM cortisol | 21.97542381 | 38.40838051 | 16.4329567  | 0.0011%     |
|                 | 22.13698196 | 38.14694786 | 16.0099659  | 0.0015%     |
|                 | 22.20594406 | 37.70048332 | 15.49453926 | 0.0022%     |

#### GR binding to SREBP1 promoter region

|                 | input(ct)   | GR(ct)      |             | GR level | mean  | p value    |
|-----------------|-------------|-------------|-------------|----------|-------|------------|
| control         | 22.89284706 | 29.65511894 | 6.762271881 | 0.9212%  | 1.10% |            |
|                 | 22.94981766 | 28.99909019 | 6.049272537 | 1.5100%  |       |            |
|                 | 22.81563377 | 29.33442497 | 6.518791199 | 1.0906%  |       |            |
| 1200nM cortisol | 22.93913269 | 29.77220917 | 6.833076477 | 0.8771%  | 1.65% | 0.01311469 |
|                 | 23.95516205 | 29.9902153  | 6.035053253 | 1.5250%  |       |            |
|                 | 24.00595093 | 29.96511078 | 5.959159851 | 1.6074%  |       |            |
|                 | 24.01413536 | 29.94905472 | 5.934919357 | 1.6346%  |       |            |
|                 | 24.08696556 | 29.86917686 | 5.782211304 | 1.8171%  |       |            |

#### SREBP1, p300 and SR-B1 mRNA and the enrichment of H3K14ac of SR-B1 in the presence of GR siRNA

| ct value         | GAPDH  | SREBP1 | SRB1   |              | GAPDH  | P300             |                 | input(ct)   | h3k14(ct)   |       | SRB1 H3K14 |
|------------------|--------|--------|--------|--------------|--------|------------------|-----------------|-------------|-------------|-------|------------|
| GRNC+Control     | 17.909 | 24.352 | 19.775 | GRNC-Control | 17.909 | 25.411           | GRNC+Control    | 23.96575546 | 31.06475546 | 7.099 | 0.73%      |
|                  | 17.780 | 24.409 | 19.891 |              | 17.780 | 25.573           |                 | 23.10193253 | 30.81893253 | 7.717 | 0.48%      |
|                  | 18.311 | 24.839 | 20.425 |              | 18.311 | 25.786           |                 | 23.1867485  | 30.5387485  | 7.352 | 0.61%      |
| 18.126           | 24.916 | 20.523 |        | 18.126       | 25.852 | GRNC+cortisol    | 23.51726151     | 29.64826151 | 6.131       | 1.43% |            |
| 18.847           | 27.194 | 22.358 |        | 18.847       | 27.641 |                  | 23.95776176     | 30.86376176 | 6.906       | 0.83% |            |
| 18.335           | 26.174 | 22.159 |        | 18.335       | 27.367 |                  | 23.53605843     | 29.89505843 | 6.359       | 1.22% |            |
| GRNC+cortisol    | 18.343 | 24.439 | 20.548 | GRNC-CORT    | 18.343 | 25.862           | GRsiRNA+Control | 23.69153404 | 30.71053404 | 7.019 | 0.77%      |
|                  | 18.665 | 24.839 | 20.464 |              | 18.665 | 26.025           |                 | 23.79726791 | 31.49926791 | 7.702 | 0.48%      |
|                  | 18.691 | 24.329 | 19.854 |              | 18.691 | 25.299           |                 | 23.96203613 | 31.37303613 | 7.411 | 0.59%      |
| 18.225           | 24.110 | 19.908 |        | 18.225       | 25.369 | GRsiRNA+cortisol | 22.66661644     | 30.65561644 | 7.989       | 0.39% |            |
| 18.509           | 23.993 | 20.507 |        | 18.509       | 25.674 |                  | 22.94659615     | 31.41359615 | 8.467       | 0.28% |            |
| 18.050           | 23.855 | 20.150 |        | 18.050       | 25.805 |                  | 22.60107231     | 29.63307231 | 7.032       | 0.76% |            |
| GRsiRNA+Control  | 18.671 | 25.592 | 21.572 | GRsiRNA-C    | 18.671 | 27.027           |                 |             |             |       |            |
|                  | 18.901 | 25.958 | 21.614 |              | 18.901 | 26.460           |                 |             |             |       |            |
|                  | 18.026 | 25.446 | 21.809 |              | 18.026 | 26.659           |                 |             |             |       |            |
| 18.993           | 25.482 | 21.748 |        | 18.993       | 26.553 |                  |                 |             |             |       |            |
| 18.723           | 26.094 | 21.317 |        | 18.723       | 27.183 |                  |                 |             |             |       |            |
| 18.615           | 26.414 | 21.597 |        | 18.615       | 27.196 |                  |                 |             |             |       |            |
| GRsiRNA+cortisol | 18.739 | 27.163 | 22.042 | GRsiRNA-CORT | 18.739 | 25.977           |                 |             |             |       |            |
|                  | 18.341 | 27.250 | 21.990 |              | 18.341 | 25.661           |                 |             |             |       |            |
|                  | 19.102 | 28.443 | 22.916 |              | 19.102 | 28.381           |                 |             |             |       |            |
| 19.407           | 28.402 | 22.967 |        | 19.407       | 28.030 |                  |                 |             |             |       |            |
| 18.245           | 25.691 | 20.535 |        | 18.245       | 27.058 |                  |                 |             |             |       |            |
| 18.107           | 25.398 | 20.517 |        | 18.107       | 26.946 |                  |                 |             |             |       |            |

p300, SR-B1 mRNA and the enrichment of H3K14ac of SR-B1 in the presence of SREBP1 siRNA

| ct value             | GAPDH  | SRB1   | p300   |                      | input(ct)   | H3K14(ct)   |             | SRB1 H3K14 |
|----------------------|--------|--------|--------|----------------------|-------------|-------------|-------------|------------|
| SREBP1NC+Control     | 19.078 | 20.976 | 26.266 | SREBP1NC+Control     | 25.15363503 | 31.27689171 | 6.123256683 | 1.43%      |
|                      | 19.003 | 20.955 | 26.240 |                      | 25.1744957  | 31.37460899 | 6.200113297 | 1.36%      |
|                      | 18.168 | 20.408 | 25.464 |                      | 25.01725197 | 31.32406235 | 6.306810379 | 1.26%      |
|                      | 18.112 | 20.475 | 25.501 |                      | 24.98763466 | 30.23046684 | 5.242832184 | 2.64%      |
|                      | 17.601 | 19.523 | 24.611 |                      | 24.91749573 | 30.63483429 | 5.717338562 | 1.90%      |
| SREBP1NC+cortisol    | 17.441 | 19.447 | 24.405 | SREBP1siRNA+Control  | 25.3627491  | 30.18658257 | 4.823833466 | 3.53%      |
|                      | 18.946 | 20.092 | 25.549 |                      | 24.78211212 | 31.17200737 | 6.389895248 | 1.19%      |
|                      | 18.702 | 20.425 | 25.548 |                      | 25.28468704 | 31.23997192 | 5.955284882 | 1.61%      |
|                      | 19.550 | 21.404 | 26.521 |                      | 25.41594505 | 31.28144989 | 5.865504837 | 1.72%      |
|                      | 19.452 | 21.095 | 26.545 |                      | 24.86794853 | 30.98734467 | 6.119396133 | 1.44%      |
| SREBP1siRNA+cortisol | 19.482 | 21.476 | 26.241 | SREBP1siRNA+cortisol | 24.97038269 | 31.36640755 | 6.396024857 | 1.19%      |
|                      | 19.853 | 21.406 | 25.939 |                      | 24.71640587 | 30.99751053 | 6.28110466  | 1.29%      |
|                      | 18.997 | 20.888 | 26.937 |                      |             |             |             |            |
|                      | 18.274 | 20.722 | 26.983 |                      |             |             |             |            |
|                      | 17.752 | 20.178 | 25.195 |                      |             |             |             |            |
| SREBP1siRNA+Control  | 17.597 | 20.201 | 25.194 |                      |             |             |             |            |
|                      | 18.324 | 21.405 | 25.881 |                      |             |             |             |            |
|                      | 18.398 | 21.289 | 25.959 |                      |             |             |             |            |
|                      | 17.882 | 20.268 | 25.448 |                      |             |             |             |            |
|                      | 17.958 | 20.303 | 25.555 |                      |             |             |             |            |
| SREBP1siRNA+cortisol | 18.429 | 20.801 | 26.009 |                      |             |             |             |            |
|                      | 18.550 | 20.765 | 27.105 |                      |             |             |             |            |
|                      | 18.578 | 20.456 | 25.724 |                      |             |             |             |            |
|                      | 18.180 | 19.898 | 25.669 |                      |             |             |             |            |

SR-B1 mRNA and the enrichment of H3K14ac of SR-B1 in the presence of p300 siRNA

| ct value            | gapdh  | SRB1   |                     | input(ct)   | H3K14(ct)   |             | SRB1 H3K14 | p value |
|---------------------|--------|--------|---------------------|-------------|-------------|-------------|------------|---------|
| p300NC+Control      | 19.932 | 21.060 | p300NC+Control      | 23.35155296 | 28.94034195 | 5.588789986 | 2.08%      | 1.63%   |
|                     | 19.273 | 21.103 |                     | 23.27741432 | 29.56392288 | 6.28650856  | 1.28%      |         |
|                     | 18.337 | 19.388 |                     | 23.23568726 | 29.26932732 | 6.03364006  | 1.53%      |         |
|                     | 18.026 | 19.496 |                     | 23.88287735 | 29.03180428 | 5.148926926 | 2.82%      | 2.93%   |
|                     | 18.016 | 19.187 |                     | 23.58593941 | 28.74478783 | 5.158848419 | 2.80%      |         |
| p300NC+cortisol     | 17.983 | 19.193 | p300 siRNA+NC       | 23.53712654 | 28.51203178 | 4.974905243 | 3.18%      |         |
|                     | 19.006 | 19.674 |                     | 23.71212196 | 29.19798279 | 5.485860825 | 2.23%      | 2.00%   |
|                     | 19.002 | 19.870 |                     | 23.64438629 | 29.29250259 | 5.648116302 | 1.99%      |         |
|                     | 18.202 | 18.946 |                     | 23.73147964 | 29.53799629 | 5.806516647 | 1.79%      |         |
|                     | 18.100 | 18.807 |                     | 22.52417946 | 28.65958565 | 6.135406189 | 1.42%      | 1.96%   |
| p300 siRNA+control  | 18.953 | 20.194 | p300 siRNA+cortisol | 22.39254189 | 27.97757034 | 5.585028458 | 2.08%      |         |
|                     | 18.943 | 20.048 |                     | 22.54251862 | 27.94387479 | 5.401356171 | 2.37%      |         |
|                     | 18.287 | 19.293 |                     |             |             |             |            |         |
|                     | 18.161 | 19.243 |                     |             |             |             |            |         |
|                     | 17.615 | 18.878 |                     |             |             |             |            |         |
| p300 siRNA+cortisol | 17.751 | 19.180 |                     |             |             |             |            |         |
|                     | 19.082 | 20.540 |                     |             |             |             |            |         |
|                     | 18.849 | 20.160 |                     |             |             |             |            |         |
|                     | 18.724 | 20.918 |                     |             |             |             |            |         |
|                     | 18.653 | 21.062 |                     |             |             |             |            |         |
| p300 siRNA+cortisol | 17.583 | 19.300 |                     |             |             |             |            |         |
|                     | 17.563 | 19.938 |                     |             |             |             |            |         |
|                     | 19.553 | 20.831 |                     |             |             |             |            |         |
|                     | 19.576 | 21.059 |                     |             |             |             |            |         |
