# Supplementary material for: The high-expression programming of SR-B1 mediates adrenal dysfunction in female offspring induced by prenatal caffeine exposure and its cholesterol accumulation mechanism
Source: Royal Society of Chemistry journal article supplement (doi:10.1039/d3fo03561a), 2023-12-09
Supplement: d3fo03561a3.pdf [file d3fo03561a3.pdf]

**Supplementary data:**

**Table S1. Rat and human primers used for reverse transcriptase-polymerase chain reaction.**

| Species             | Genes               | Forward primers (5'-3') | Reverse primers (5'-3') | Annealing              |            |
|---------------------|---------------------|-------------------------|-------------------------|------------------------|------------|
| Rat                 | GAPDH               | GCAAGTTCAATGGCACAG      | AAGTTCTTCTGGCCGGTAT     | 60°C, 30 s             |            |
|                     | StAR                | GGGAGATGCCTGAGCAAAGC    | GCTGGCGAACTCTATCTGGGT   | 60°C, 30 s             |            |
|                     | P450 <sub>scc</sub> | GCTGCCTGGGATGTGATTTTC   | GATGTTGGCCTGGATGTTCTTG  | 60°C, 30 s             |            |
|                     | 3β-HSD              | TCTACTGCAGCACAGTTGAC    | ATACCCTTATTTTTGAGGGC    | 60°C, 30 s             |            |
|                     | P450 <sub>c21</sub> | ATGAGCGTGAGTAGACAG      | GATGCGTGTCGCATGGTC      | 60°C, 30 s             |            |
|                     | P450 <sub>c11</sub> | CCGCTTGTAGGATGTTGTAG    | CAGGCTCTAAGGTGTCCAGT    | 60°C, 30 s             |            |
|                     | HMGCR               | CTGGTGAGTTGTCCTTGATG    | CCGTGTTTTCAGTCCAGTATG   | 60°C, 30 s             |            |
|                     | SREBP2              | AGAAGGAGAAAGGCGGACAA    | TCTCCTGGCGCAGTTTATGA    | 60°C, 30 s             |            |
|                     | SR-B1               | CTTCTGGTGCCCATCATTTA    | CCTACAGCTTGGCTTCTTG     | 60°C, 30 s             |            |
|                     | LDLR                | GGATCCATGGCAACATCTAC    | ACCCTTTCTCTCGGAACA      | 60°C, 30 s             |            |
|                     | ABCA1               | AGAGCTAGGTCTCCCTT       | CACTGCCCTGTAAATGG       | 60°C, 30 s             |            |
|                     | ABCG1               | TCTGACCTTTCCCCTCGAGAT   | AGTACACGATGCTGCAGTAGGC  | 60°C, 30 s             |            |
|                     | NLRP3               | GAGCCTACAGTTGGGTGAAA    | GCTTCCACACCTACCAAGAA    | 60°C, 30 s             |            |
|                     | caspase1            | AAGACAAGCCCAAGGTTATCA   | AAGAATCCCTCTTCGGAGTTTC  | 60°C, 30 s             |            |
|                     | IL-1β               | TCTGACAGGCAACCACTTAC    | CATCCCATACACACGGACAA    | 60°C, 30 s             |            |
|                     | GR                  | CACCCATGACCCTGTCAGTC    | AAAGCCTCCCTCTGCTAACC    | 60°C, 30 s             |            |
|                     | SREBP1              | CAGTACCCTTGAGGACCTTTG   | ATCTCCAGATCTGCCACTAGA   | 60°C, 30 s             |            |
|                     | p300                | CAAATGCAGGCATGGGCAAT    | TCCTGGTTGTCCTCCCATCT    | 60°C, 30 s             |            |
|                     | Human               | GAPDH                   | CCATGGGTGGAATCATATTGGA  | TCAACGGATTTGGTCGTATTGG | 60°C, 30 s |
|                     |                     | StAR                    | ACAGACTTCGGGAACATGC     | TGAGTAGCCACGTAAGTTTGG  | 60°C, 30 s |
| P450 <sub>scc</sub> |                     | AAGTCCACCTTCACCATGTC    | TGAGGAATCGTTCTGGGTTG    | 60°C, 30 s             |            |
| SR-B1               |                     | TTGATGCCCAAGGTGATG      | CCTTATCCTTTGAGCCCTTT    | 60°C, 30 s             |            |
| NLRP3               |                     | TTGGTGAATTCTGGCCTTAC    | GAGTCCCTCACAGAGTAGTT    | 60°C, 30 s             |            |
| caspase1            |                     | GTTCTGGTGTTCATGTCTC     | CTTGGGCAGTTCTTGGTATT    | 60°C, 30 s             |            |
| IL-1β               |                     | CATGGGATAACGAGGCTTATG   | CCACTTGTTGCTCCATATCC    | 60°C, 30 s             |            |
| GR                  |                     | GCAGCAGTGAAATGGGCAAA    | CAGCAGGTTTGCACCTTGATTGT | 60°C, 30 s             |            |

|        |                         |                        |            |
|--------|-------------------------|------------------------|------------|
| SREBP1 | CACTGAGGCAAAGCTGAATAAAT | TAGGTTCTCCTGCTTGAGTTTC | 60°C, 30 s |
| p300   | GGCTGTATCAGAGCGTATTG    | TCTTCCTCCTGTTCCAGTT    | 60°C, 30 s |

GAPDH, glyceraldehyde-3-phosphate dehydrogenase; StAR, steroidogenic acute regulatory protein; P450scc, cytochrome P450 cholesterol side chain cleavage; 3 $\beta$ -HSD, 3 $\beta$ -hydroxysteroid dehydrogenase; P450c11, steroid 11 $\beta$ -hydroxylase; P450c21, steroid 21-hydroxylase; HMGCR, 3-hydroxy-3-methylglutaryl coenzyme A reductase; SR-B1, scavenger receptorB1; LDLR, low-density lipoprotein receptor ; ABCA1, ATP-binding cassette protein A1; NLRP3, NOD-like receptor family protein 3; IL-1 $\beta$ , interleukine-1 $\beta$ ; GR, glucocorticoid receptor; SREBP1, sterol regulatory element-binding protein 1.

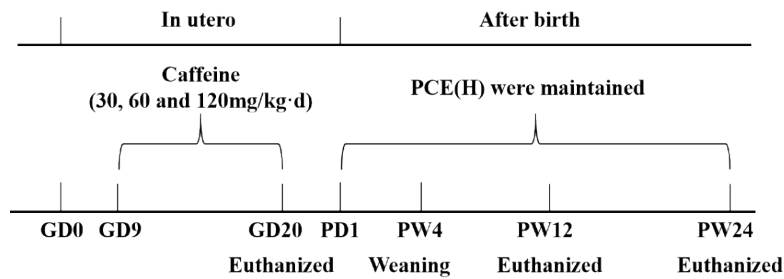

**Fig S1. Animal experimental treatment.** GD, gestational day; PD, postnatal day; PW, postnatal week; PCE, prenatal caffeine exposure.

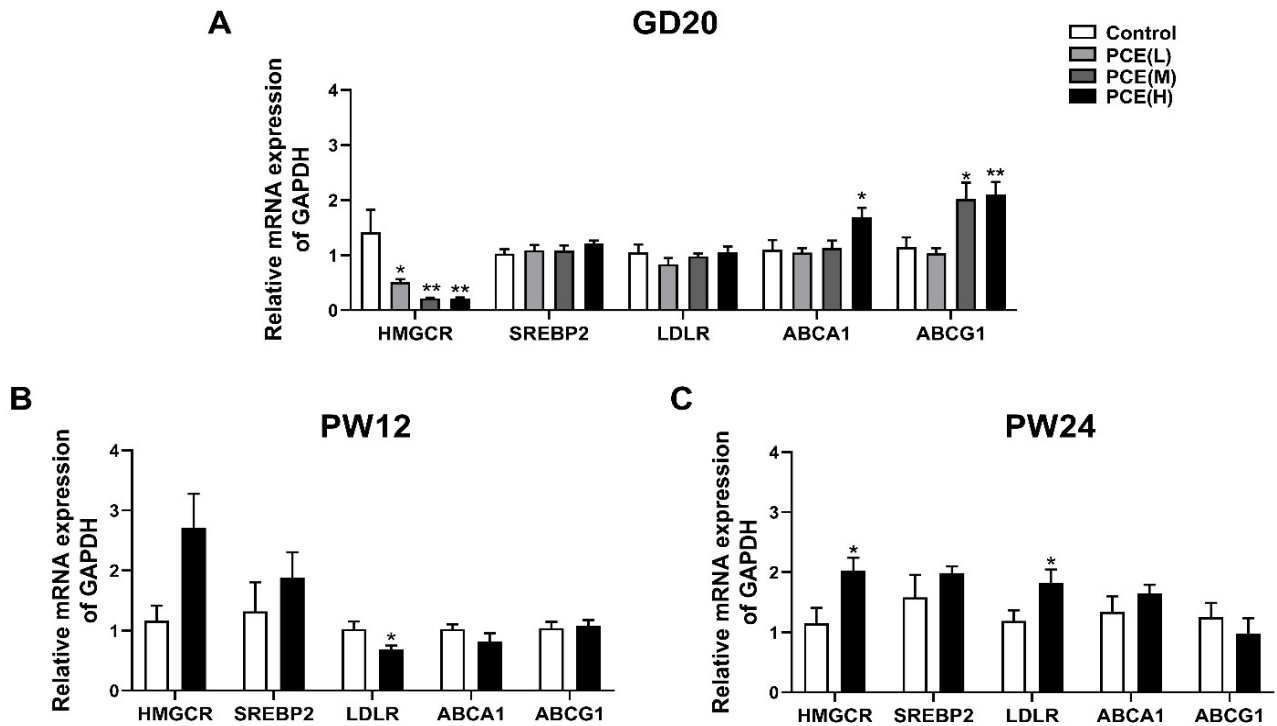

**Fig S2. Change in the expression of adrenal cholesterol metabolism genes induced by PCE in female offspring**

**rats.** (A-C) The mRNA expression of cholesterol metabolism genes, including HMGCR, SREBP2, LDLR, ABCA1 and ABCG1 on GD20, PW12 and PW24. Mean  $\pm$  S.E.M., n = 12 from 12 different litters for RT-qPCR. \* $P$ <0.05, \*\* $P$ <0.01 vs. respective controls. PCE, prenatal caffeine exposure; GD, gestation day; PW, postnatal week; HMGCR, 3-hydroxy-3-methylglutaryl coenzyme A reductase; SREBP2, sterol regulatory element-binding protein 2; LDLR, low-density lipoprotein receptor; ABCA1, ATP-binding cassette protein A1; ABCG1, ATP binding cassette G1; GAPDH, glyceraldehyde 3-phosphate dehydrogenase.

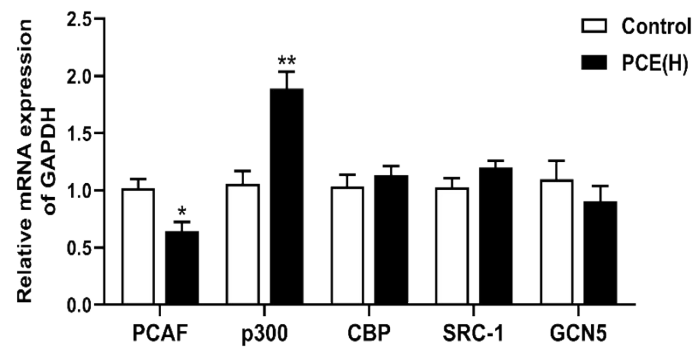

**Fig S3. Change in the expression of adrenal histone acetylases induced by PCE in female fetal rats.** Mean  $\pm$  S.E.M., n = 12 from 12 different litters for RT-qPCR. \* $P$ <0.05, \*\* $P$ <0.01 vs. respective controls. PCE, prenatal caffeine exposure; PCAF, P300/CBP-associating factor, CBP, cAMP-response element (CRE)-binding protein; SRC-1, steroid receptor coactivator-1; GCN5, related N-acetyltransferases.

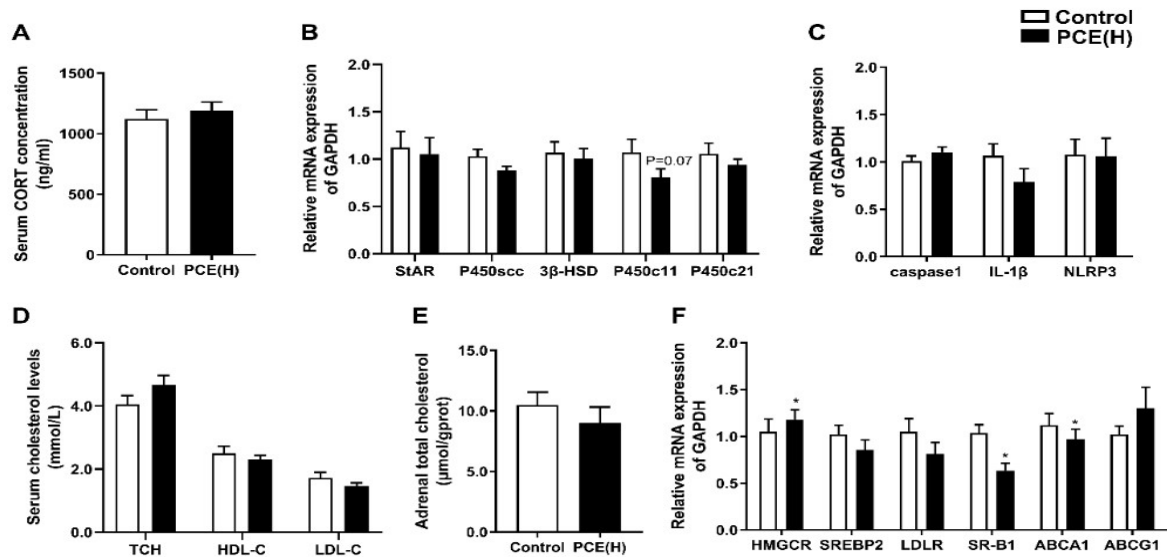

**Fig S4. Effects of PCE on steroidogenic function, pyroptosis and cholesterol metabolism in adult male offspring.** (A) The concentration of serum corticosterone in PW12; (B) The mRNA expression of steroidogenic enzymes in PW12, including StAR, P450scc, 3β-HSD, P450c21 and P450c11; (C) The mRNA expression of NLRP3, caspase1 and IL-1β in PW12. (D) The concentration of serum TCH, HDL-C and LDL-C in PW12; (E) The content of adrenal TCH in PW12; (F) The mRNA expression of cholesterol metabolism genes in PW12, including HMGCR, SREBP2, LDLR, SR-B1, ABCA1 and ABCG1. Mean  $\pm$  S.E.M., n = 12 from 12 different litters for RT-qPCR. \* $P$ <0.05, \*\* $P$ <0.01 vs. respective controls. PW, postnatal week; PCE, prenatal caffeine exposure; StAR, steroidogenic

acute regulatory protein; P450<sub>scc</sub>, cytochrome P450 cholesterol side chain cleavage; 3 $\beta$ -HSD, 3 $\beta$ -hydroxysteroid dehydrogenase; P450<sub>c11</sub>, steroid 11 $\beta$ -hydroxylase; P450<sub>c21</sub>, steroid 21-hydroxylase; NLRP3, NOD-like receptor family protein 3; IL-1 $\beta$ , interleukine-1 $\beta$ ; TCH, total cholesterol; HDL-C, high density lipoprotein cholesterol; LDL-C, low density lipoprotein cholesterol; HMGCR, 3-hydroxy-3-methylglutaryl coenzyme A reductase; SREBP2, sterol regulatory element-binding protein 2; LDLR, low-density lipoprotein receptor; SR-B1, scavenger receptor-B1; ABCA1, ATP-binding cassette protein A1; ABCG1, ATP binding cassette G1.
