# Supplementary figures and images for: The high-expression programming of SR-B1 mediates adrenal dysfunction in female offspring induced by prenatal caffeine exposure and its cholesterol accumulation mechanism
Source: Royal Society of Chemistry journal article supplement (doi:10.1039/d3fo03561a), 2023-12-09

**Fig 1B**

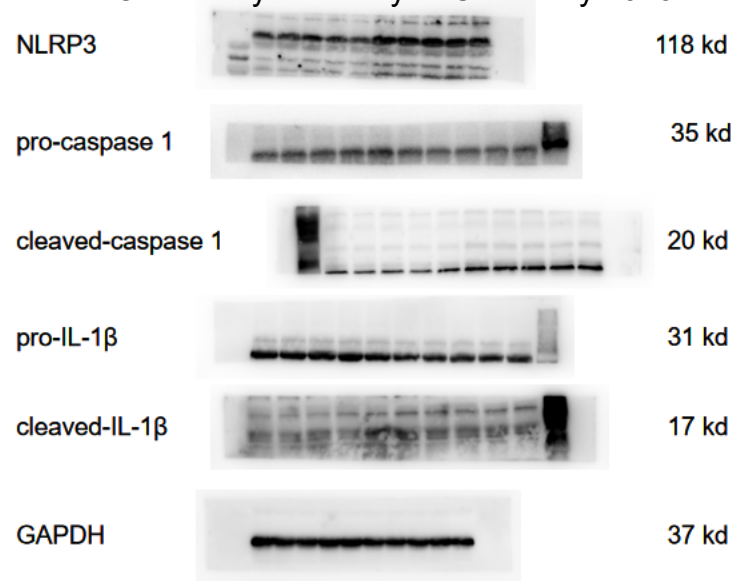

**Fig 1K**

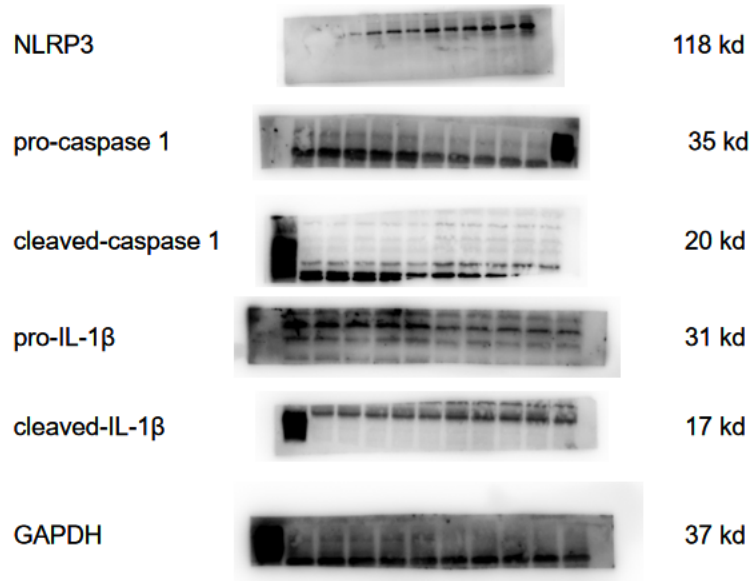

**Fig 2D**

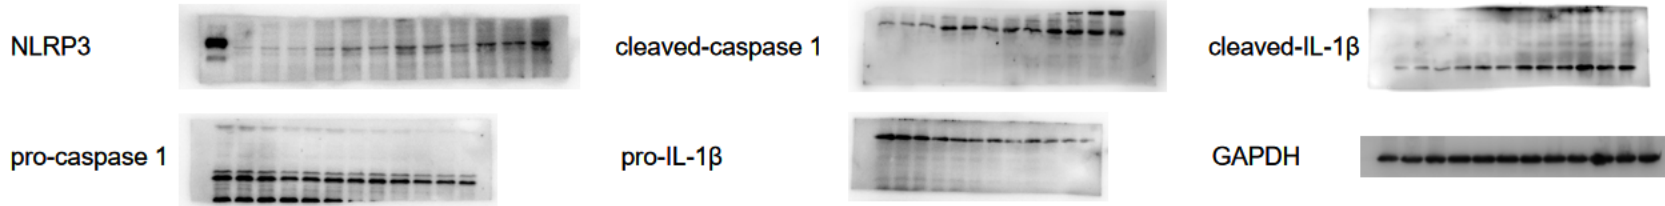

**Fig 3H**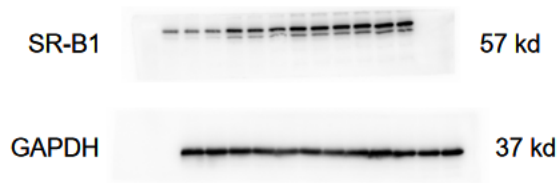**Fig 5B**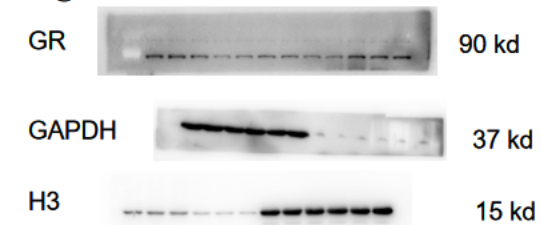**Fig 5F**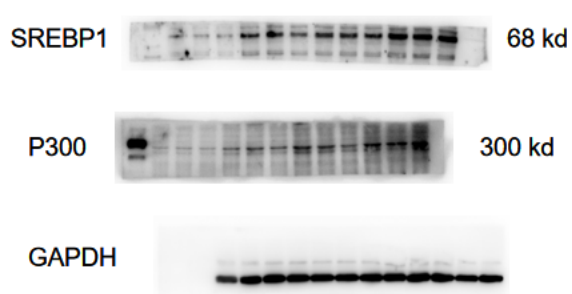**Fig 6C**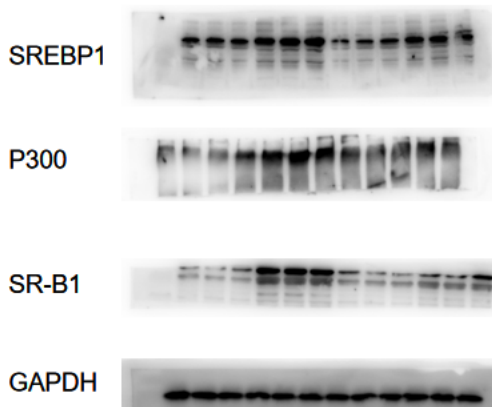**Fig 6G**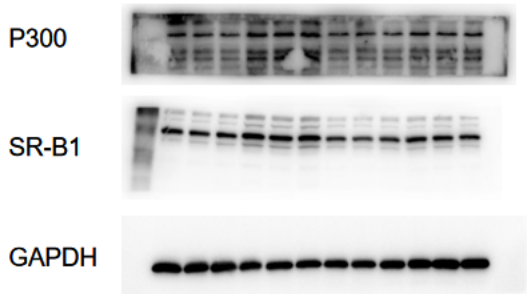**Fig 6K**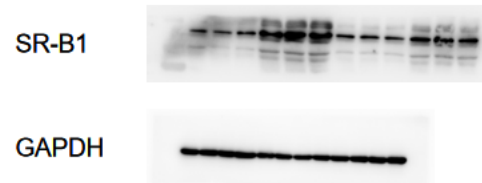

Supplement: d3fo03561a1.pdf [file d3fo03561a1.pdf]
